# Supplementary figures and images for: Total and unbound darunavir pharmacokinetics in pregnant women infected with HIV-1: results of a study of darunavir/ritonavir 600/100 mg administered twice daily
Source: PubMed Central journal article supplement — HIV Med. 2013 Jun 3;15(1):50–6. doi: 10.1111/hiv.12047 (PMC4231999; doi:10.1111/hiv.12047), 2013-06-03

Fig. S2

A

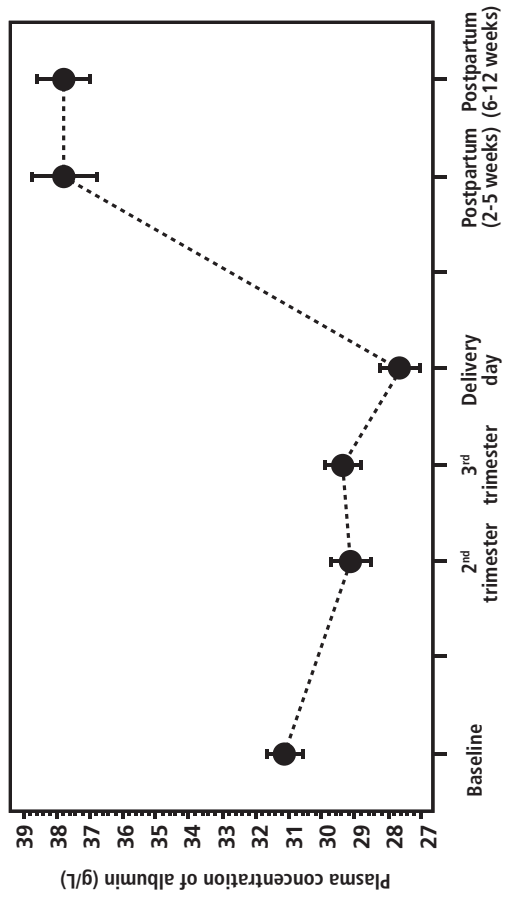

B

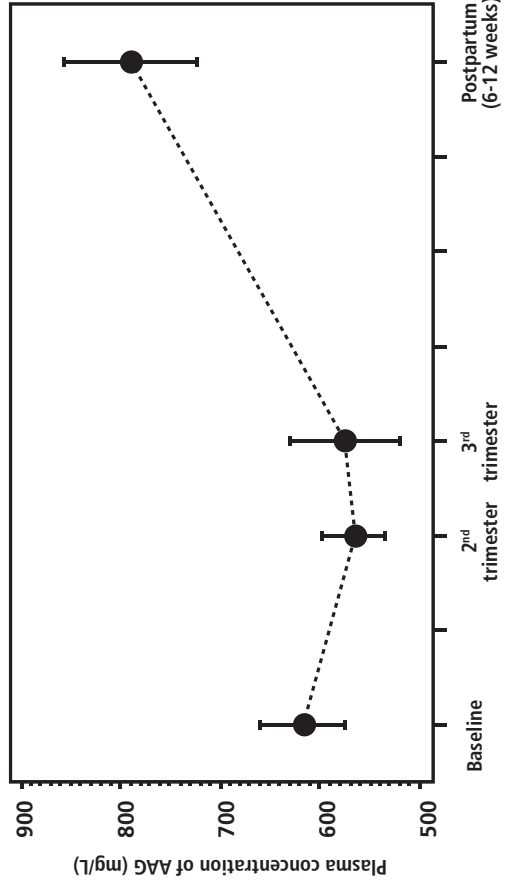

Supplement: hiv0015-0050-sd2.pdf [file hiv0015-0050-sd2.pdf]

Fig. S3

A

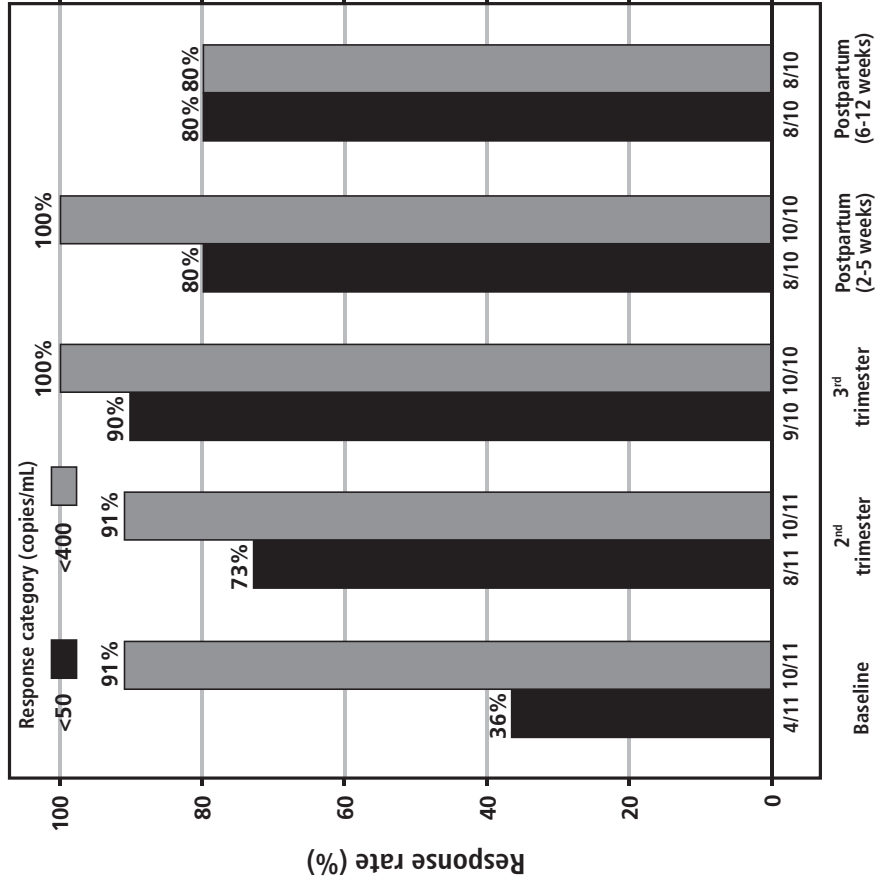

B

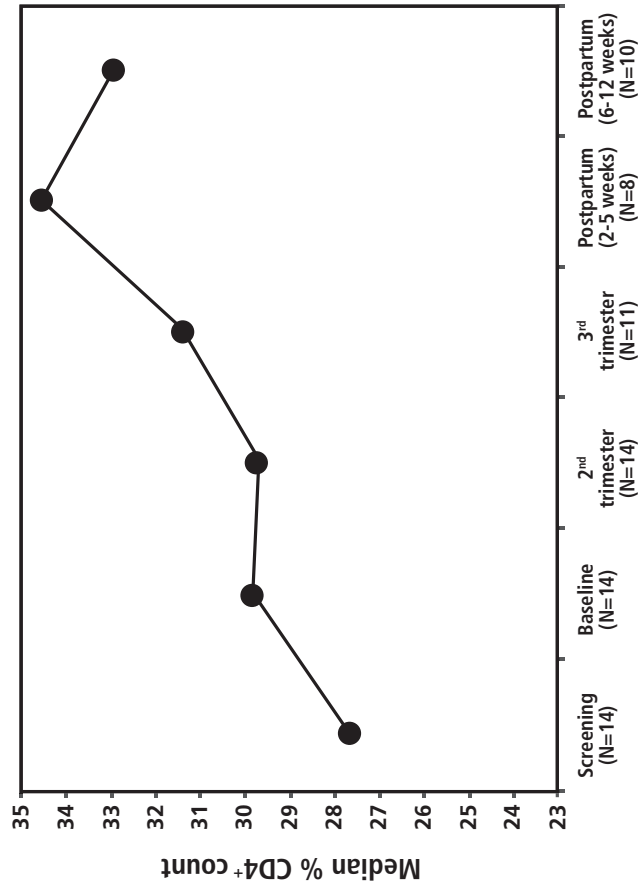

Supplement: hiv0015-0050-sd3.pdf [file hiv0015-0050-sd3.pdf]
